# Supplementary material for: The major stratospheric final warming in 2016: dispersal of vortex air and termination of Arctic chemical ozone loss
Source: Copernicus journal article supplement (doi:10.5194/acp-16-15371-2016), 2016-12-12
Supplement: Supplementary file 2 [file acp-16-15371-2016-supplement.zip]

Archive with 4 entries (4 files):
- CAVEART_VortexID_SupplementAnimation.avi
- acp-16-15371-2016-supplement-title-page.pdf
- M-vs-sPV_ScatterPlots_SupplementAnimation.avi
- SupplementaryInformationText.pdf
