# Supplementary material for: The major stratospheric final warming in 2016: dispersal of vortex air and termination of Arctic chemical ozone loss
Source: Copernicus journal article supplement (doi:10.5194/acp-16-15371-2016), 2016-12-12
Supplement: Supplementary file 2 [file acp-16-15371-2016-supplement.zip › acp-16-15371-2016-supplement-title-page.pdf]

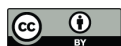

## *Supplement of*

# **The major stratospheric final warming in 2016: dispersal of vortex air and termination of Arctic chemical ozone loss**

**Gloria L. Manney and Zachary D. Lawrence**

*Correspondence to:* Gloria L. Manney (manney@nwra.com)

- [acp-16-15371-2016-supplement-title-page.pdf](#)
- [CAVEART\\_VortexID\\_SupplementAnimation.avi](#)
- [M-vs-sPV\\_ScatterPlots\\_SupplementAnimation.avi](#)
- [SupplementaryInformationText.pdf](#)

The copyright of individual parts of the supplement might differ from the CC-BY 3.0 licence.
